# Supplementary figures and images for: 195 コールドタンデミル用形状計(制御・非破壊検査・表面処理・設備, 加工・試験・検査, 日本鉄鋼協会第 93 回(春季)講演大会)
Source: Springer Nature journal article supplement (doi:10.1186/1471-2229-10-35), 1977-03-05

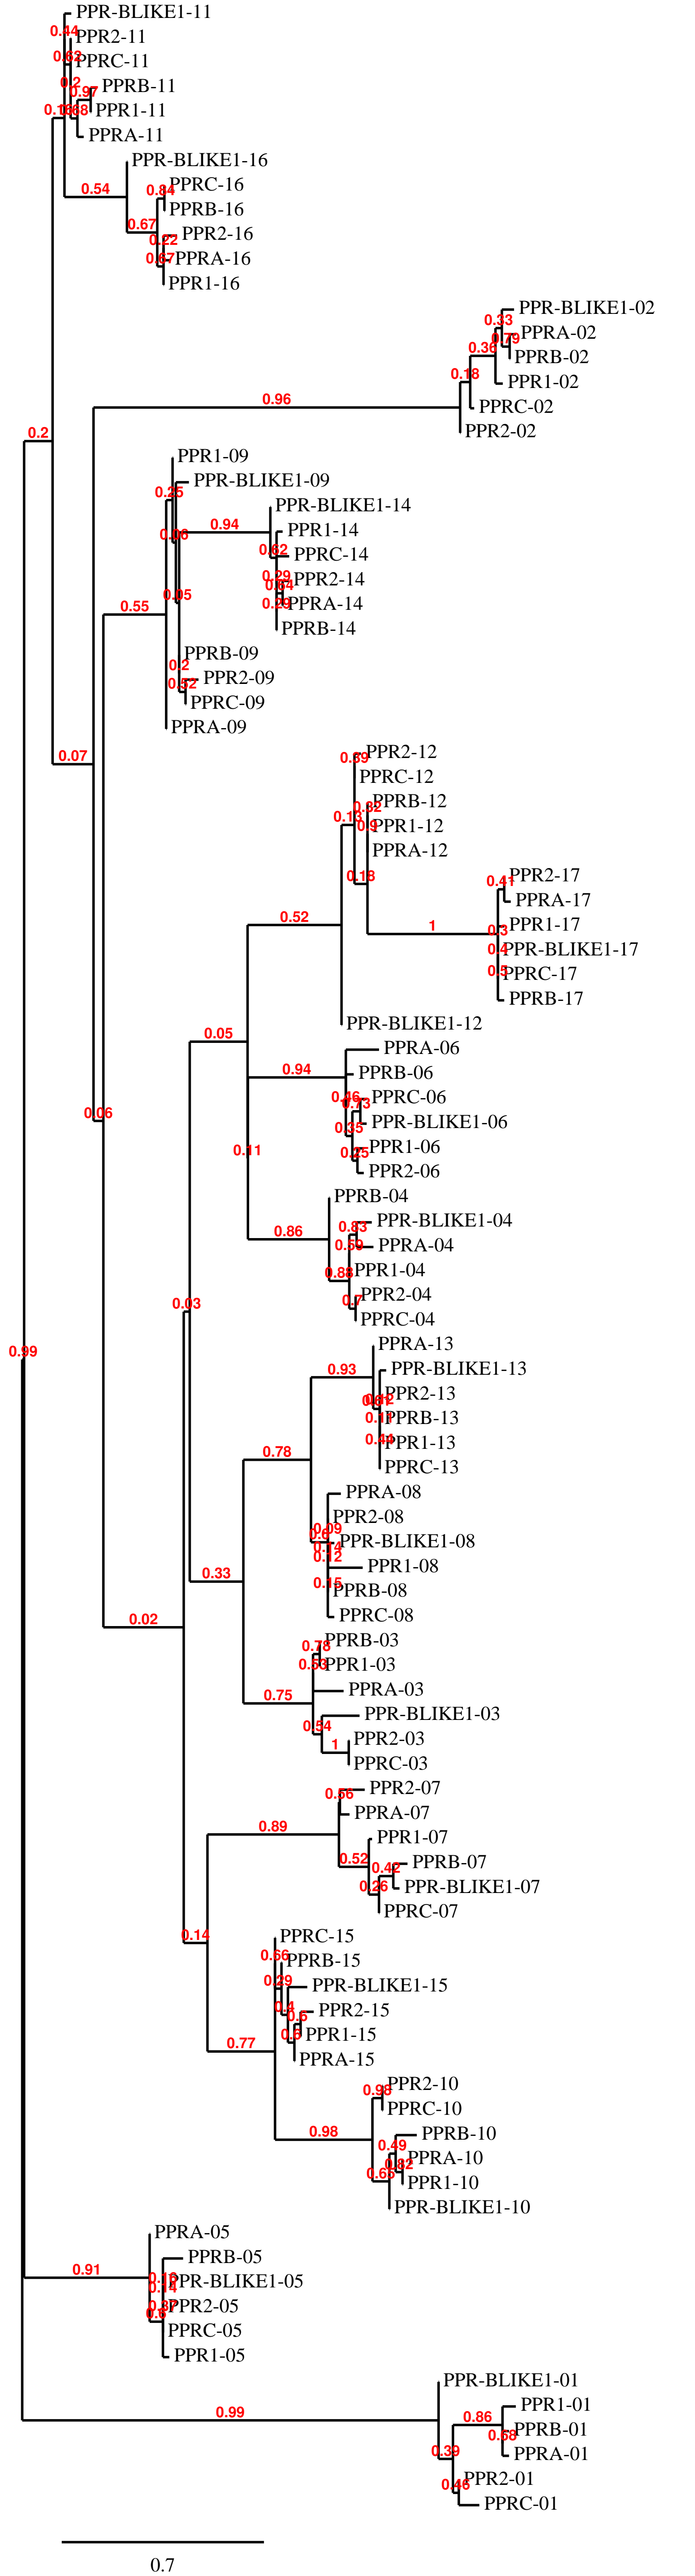

Supplement: Additional file 2 [file 1471-2229-10-35-s2.pdf]
